# Supplementary material for: Genome-wide association study for resistance to stripe rust (Puccinia striiformis f. sp. tritici) races from Argentina in bread wheat (Triticum aestivum L.)
Source: Research Square preprint supplement (doi:10.21203/rs.3.rs-2010006/v1), 2022-09-12
Supplement: Supplementary file 1 [file 5c18511fcde4036a7b5269b4.xlsx]

## Sheet: Sheet 1
Genome-wide association study for resistance to stripe rust (Puccinia striiformis f. sp. tritici) races from Argentina in bread wheat (Triticum aestivum L.)
Franco M.F. 1, 2, 4 *, ID1, Polacco A.N.1, Campos P.E.3, Pontaroli A.C. 2, 4 and Vanzetti L.S.2, 5, ID2
1 Facultad de Ciencias Agrarias, Universidad Nacional de Mar del Plata, Balcarce, CP 7620, Argentina.
2 Consejo Nacional de Investigaciones Científicas y Técnicas (CONICET), Buenos Aires, Argentina.
3 Estación Experimental Agropecuaria INTA Bordenave, Bordenave, CP 8187, Argentina.
4 Estación Experimental Agropecuaria INTA Balcarce, Balcarce, CP 7620, Argentina.
5 Estación Experimental Agropecuaria INTA Marcos Juárez, Marcos Juárez, CP 2580, Argentina.
* E-mail: franco.fiorella@inta.gob.ar

## Sheet: Supplementary Table S1
Supplementary Table S1. Analysis of variance (ANOVA) to determine the significance of the fixed effects of genotypes for Infection type for Yr19-71 and Yr20-161 races.
Trait	Source of variation	Df	Sum Sq	Mean Sq	F value	Pr(>F)	Signif. Codes
IT (Yr19-71)	Genotype	250	10277.1	41.109	168.34	< 2.2 x10-16	***
	Residuals	2258	551.4	0.244
IT (Yr20-161)	Genotype	250	15263.2	61.053	166.65	< 2.2 x10-16	***
	Residuals	2259	827.6	0.366
Signif. codes: 0 ‘***’ 0.001 ‘**’ 0.01 ‘*’ 0.05 ‘.’ 0.1 ‘ ’ 1

## Sheet: Supplementary Table S2
Supplementary Table S2. Sequential restricted maximum likelihood ratio tests to determine the significances of the random effects of genotypes and genotype by year interactions for DS and AUDPC.
Trait	Modela	dfb	AICc	BICd	logLike	Test	L. Ratiof	P-value
DS	1	19	-115.857	-32.8286	76.9283
	2	18	-85.6669	-7.0087	60.8334	1 vs 2	32.1898	<.0001
	3	17	283.292	357.58	-124.646	2 vs 3	370.959	<.0001
AUDPC	1	19	110.418	193.446	-36.2089
	2	18	119.647	198.305	-41.8233	1 vs 2	11.2289	0.0008
	3	17	588.123	662.412	-277.062	2 vs 3	470.476	<.0001
a Model 1 is the complete model. Models 2 and 3, sequentially omit the random effect of genotype by environment interaction and random effect of the genotype.
b Degrees of freedom
c Akaike information criterion
d Bayesian information criterion
e Log-Likelihood
f Likelihood-ratio test

## Sheet: Supplementary Table S3
Supplementary Table S3. Variance component estimates (genotypic, genotype x year interaction and residual variances) and broad-sense heritability (H2) for the analyzed traits
Traita
DS	0.0671545	0.00700433	0.00973368	0.889187
AUDPC	45.1584	1.40897	5.77441	0.926535

## Sheet: Supplementary Table S4
Supplementary Table S4. Information of the reported stripe rust resistance genes or quantitative trait loci on the segments of the chromosomes containing the genomic regions identified in this study
Chromsome	Gene/QTL	left marker	right marker	Reference
1B	Yr10	Xpsp3000	N	Wang L, Ma J, Zhou R, Wang X, Jia J (2002) Molecular tagging of the yellow rust resistance gene Yr10 in common wheat, PI 178383 (Triticum aestivum L.). Euphytica 124 (1):71-73
1B	QYr.cau-1BS	barc194	gwm374	Quan W, Hou G, Chen J, Du Z, Lin F, Guo Y, Liu S, Zhang Z (2013) Mapping of QTL lengthening the latent period of Puccinia striiformis in winter wheat at the tillering growth stage. Eur J Plant Pathol 136 (4):715-727
1B	YrH52	Xgwm413	Xgwm273	Peng J, Fahima T, Röder M, Li Y, Dahan A, Grama A, Ronin Y, Korol A, Nevo E (1999) Microsatellite tagging of the stripe-rust resistance gene YrH52 derived from wild emmer wheat, Triticum dicoccoides, and suggestive negative crossover interference on chromosome 1B. Theor Appl Genet 98 (6):862-872
1B	YrMY41	Xwmc406	Xgwm18	Yong R, LI S-r, WEI Y-m, Qiang Z, DU X-y, HE Y-j, ZHENG Y-l (2015) Molecular mapping of a stripe rust resistance gene in Chinese wheat cultivar Mianmai 41. Journal of Integrative Agriculture 14 (2):295-304
1B	YrAlp	Xwgp47	Xwgp48	Lin F, Chen X (2007) Genetics and molecular mapping of genes for race-specific all-stage resistance and non-race-specific high-temperature adult-plant resistance to stripe rust in spring wheat cultivar Alpowa. Theor Appl Genet 114 (7):1277-1287
1B	QYrco.wpg-1B.2	Xbrac119	Xbarc137	Case AJ, Naruoka Y, Chen X, Garland-Campbell KA, Zemetra RS, Carter AH (2014) Mapping stripe rust resistance in a BrundageXCoda winter wheat recombinant inbred line population. PloS one 9 (3):e91758
1B	Yr15	Uhw264	Uhw259	Klymiuk V, Yaniv E, Huang L, Raats D, Fatiukha A, Chen S, Feng L, Frenkel Z, Krugman T, Lidzbarsky G (2018) Cloning of the wheat Yr15 resistance gene sheds light on the plant tandem kinase-pseudokinase family. Nature communications 9 (1):1-12
1B	YrTx43	Xgwm413	Xgwm18	Yao W, Liu Z, Fan Y, Shen X, Chao K, Hou L, Li J (2015) Inheritance and molecular markers for yellow rust resistant gene( s) in wheat cultivar Tianxuan43. Acta Phytopathology 45:48-56
1B	Yr64	Xgwm413	Xgwm498	Cheng P, Xu L, Wang M, See D, Chen X (2014) Molecular mapping of genes Yr64 and Yr65 for stripe rust resistance in hexaploid derivatives of durum wheat accessions PI 331260 and PI 480016. Theor Appl Genet 127 (10):2267-2277
2A	QYrns.orz-2AL	wPt-7011	N	Vazquez MD, Peterson CJ, Riera-Lizarazu O, Chen X, Heesacker A, Ammar K, Crossa J, Mundt CC (2012) Genetic analysis of adult plant, quantitative resistance to stripe rust in wheat cultivar ‘Stephens’ in multi-environment trials. Theor Appl Genet 124 (1):1-11
2A	YRxy2	Xgwm794	XBarc5	Zhou X, Wang W, Wang L, Hou D, Jing J, Wang Y, Xu Z, Yao Q, Yin J, Ma D (2011) Genetics and molecular mapping of genes for high-temperature resistance to stripe rust in wheat cultivar Xiaoyan 54. Theor Appl Genet 123 (3):431-438
2A	QYr.wpg-2A.5	IWA5855	N	Naruoka Y, Garland-Campbell K, Carter A (2015) Genome-wide association mapping for stripe rust (Puccinia striiformis f. sp. tritici) in US Pacific Northwest winter wheat (Triticum aestivum L.). Theor Appl Genet 128 (6):1083-1101
2A	YR32	wmc170	wmc181	Eriksen L, Afshari F, Christiansen M, McIntosh R, Jahoor A, Wellings C (2004) Yr32 for resistance to stripe (yellow) rust present in the wheat cultivar Carstens V. Theor Appl Genet 108 (3):567-575
2A	QYr.caas-2AL	wsnp_Ex_c16627_25162391	BS00092550_51	Liu J, He Z, Wu L, Bai B, Wen W, Xie C, Xia X (2015) Genome-wide linkage mapping of QTL for adult-plant resistance to stripe rust in a Chinese wheat population Linmai 2× Zhong 892. PloS one 10 (12):e0145462
2A	QYr.inra_2AL.2_Camp Remy	Xgwm359	Xgwm382	Boukhatem N, Baret P, Mingeot D, Jacquemin J (2002) Quantitative trait loci for resistance against yellow rust in two wheat-derived recombinant inbred line populations. Theor Appl Genet 104 (1):111-118
2A	QYr.cau-2AL	gwm311	IWB44575	Wang Z, Ren J, Du Z, Che M, Zhang Y, Quan W, Jiang X, Ma Y, Zhao Y, Zhang Z (2019) Identification of a major QTL on chromosome arm 2AL for reducing yellow rust severity from a Chinese wheat landrace with evidence for durable resistance. Theor Appl Genet 132 (2):457-471
2A	YrJ22	IWA1348	Xwmc658	Chen C, He Z, Lu J, Li J, Ren Y, Ma C, Xia X (2016) Molecular mapping of stripe rust resistance gene YrJ22 in Chinese wheat cultivar Jimai 22. Mol Breed 36 (8):1-8
2A	YR1	wmc658	N	McIntosh R, Yamazaki Y, Dubcovsky J, Rogers J, Morris C, Appels R, Xia X (2013) Catalogue of gene symbols for wheat in 12th international wheat genetics symposium.
2A	QYr.wpg-2A.6	IWA966	N	Naruoka Y, Garland-Campbell K, Carter A (2015) Genome-wide association mapping for stripe rust (Puccinia striiformis f. sp. tritici) in US Pacific Northwest winter wheat (Triticum aestivum L.). Theor Appl Genet 128 (6):1083-1101
3A	QYr-3A_Saar	Xstm844tcac	Xbarc310	Lillemo M, Asalf B, Singh R, Huerta-Espino J, Chen X, He Z, Bjørnstad Å (2008) The adult plant rust resistance loci Lr34/Yr18 and Lr46/Yr29 are important determinants of partial resistance to powdery mildew in bread wheat line Saar. Theor Appl Genet 116 (8):1155-1166
3A	Yr76	Xwmc11	Xwmc532	Xiang C, Feng J, Wang M, Chen X, See D, Wan A, Wang T (2016) Molecular mapping of stripe rust resistance gene Yr76 in winter club wheat cultivar Tyee. Phytopathology 106 (10):1186-1193
3A	QYr.caas-3AS_IWB48450	Xkukri_c96747_274	Xkukri_rep_c102131_891	Liu J, He Z, Wu L, Bai B, Wen W, Xie C, Xia X (2015) Genome-wide linkage mapping of QTL for adult-plant resistance to stripe rust in a Chinese wheat population Linmai 2× Zhong 892. PloS one 10 (12):e0145462
3A	YrHu	Xcfd79	XBG604577	Ma D, Fang Z, Yin J, Chao K, Jing J, Li Q, Wang B (2016) Molecular mapping of stripe rust resistance gene YrHu derived from Psathyrostachys huashanica. Mol Breed 36 (6):1-9
3B	Yr4	Xbarc75	N	McIntosh R, Yamazaki Y, Dubcovsky J, Rogers J, Morris C, Appels R, Xia X (2013) Catalogue of gene symbols for wheat in 12th international wheat genetics symposium.
3B	Yr57	Xgwm389	XksuG53	Randhawa MS, Bariana HS, Mago R, Bansal UK (2015) Mapping of a new stripe rust resistance locus Yr57 on chromosome 3BS of wheat. Mol Breed 35 (2):1-8
3B	Yr30	Xgwm389	N	Suenaga K, Singh R, Huerta-Espino J, William H (2003) Microsatellite markers for genes Lr34/Yr18 and other quantitative trait loci for leaf rust and stripe rust resistance in bread wheat. Phytopathology 93 (7):881-890
3B	Yrns-B1	Xgwm493	Xgwm1329	Khlestkina E, Röder M, Unger O, Meinel A, Börner A (2007) More precise map position and origin of a durable non-specific adult plant disease resistance against stripe rust (Puccinia striiformis) in wheat. Euphytica 153 (1):1-10
3B	QYr-3B_Alturas	Xgwm238	Xgwm389	Zhao L, Feng J, Zhang C-Y, Xu X-D, Chen X-M, Sun Q, Miao Q, Xu S-C, Lin F (2012) The dissection and SSR mapping of a high-temperature adult-plant stripe rust resistance gene in American spring wheat cultivar Alturas. Eur J Plant Pathol 134 (2):281-288
3B	QYrco.wpg-3B.1_Brundage	IWA6587	IWA288	Case AJ, Naruoka Y, Chen X, Garland-Campbell KA, Zemetra RS, Carter AH (2014) Mapping stripe rust resistance in a BrundageXCoda winter wheat recombinant inbred line population. PloS one 9 (3):e91758
3B	QYr-3B_Oligoculm	Xgwm389	Xgwm533	Suenaga K, Singh R, Huerta-Espino J, William H (2003) Microsatellite markers for genes Lr34/Yr18 and other quantitative trait loci for leaf rust and stripe rust resistance in bread wheat. Phytopathology 93 (7):881-890
3B	QYr.cim‐3BS_Chapio_Yr30	Xbarc147	wPt-3038	Yang E-N, Rosewarne G, Herrera-Foessel S, Huerta-Espino J, Tang Z-X, Sun C-F, Ren Z-L, Singh R (2013) QTL analysis of the spring wheat “Chapio” identifies stable stripe rust resistance despite inter-continental genotype× environment interactions. Theor Appl Genet 126 (7):1721-1732
3B	QYr-3B.1_Pavon	Xgwm533	N	William H, Singh R, Huerta-Espino J, Palacios G, Suenaga K (2006) Characterization of genetic loci conferring adult plant resistance to leaf rust and stripe rust in spring wheat. Genome 49 (8):977-990
3B	QYr.tam-3B_Quaiu	Xgwm533	N	Basnet B, Singh R, Ibrahim A, Herrera-Foessel S, Huerta-Espino J, Lan C, Rudd J (2014) Characterization of Yr54 and other genes associated with adult plant resistance to yellow rust and leaf rust in common wheat Quaiu 3. Mol Breed 33 (2):385-399
3B	QYr.cim-3BS.2_Francolin#1	gwm533	Xbarc133	Lan C, Rosewarne GM, Singh RP, Herrera-Foessel SA, Huerta-Espino J, Basnet BR, Zhang Y, Yang E (2014) QTL characterization of resistance to leaf rust and stripe rust in the spring wheat line Francolin# 1. Mol Breed 34 (3):789-803
3B	QYr.inra-3BS_Renan	Xgwm533	N	Dedryver F, Paillard S, Mallard S, Robert O, Trottet M, Negre S, Verplancke G, Jahier J (2009) Characterization of genetic components involved in durable resistance to stripe rust in the bread wheat ‘Renan’. Phytopathology 99 (8):968-973
3B	QYr.ucw-3B.2	IWA5202	N	Maccaferri M, Zhang J, Bulli P, Abate Z, Chao S, Cantu D, Bossolini E, Chen X, Pumphrey M, Dubcovsky J (2015) A genome-wide association study of resistance to stripe rust (Puccinia striiformis f. sp. tritici) in a worldwide collection of hexaploid spring wheat (Triticum aestivum L.). G3: Genes, Genomes, Genetics 5 (3):449-465
3B	QYr.caas-3BS	Excalibur_c30762_514	IAAV5662	Liu J, He Z, Wu L, Bai B, Wen W, Xie C, Xia X (2015) Genome-wide linkage mapping of QTL for adult-plant resistance to stripe rust in a Chinese wheat population Linmai 2× Zhong 892. PloS one 10 (12):e0145462
3B	QYr.sun-3B_Kukri	Xgwm533	wPt-5906	Bariana H, Bansal U, Schmidt A, Lehmensiek A, Kaur J, Miah H, Howes N, McIntyre C (2010) Molecular mapping of adult plant stripe rust resistance in wheat and identification of pyramided QTL genotypes. Euphytica 176 (2):251-260
5B	Yr47	Xgwm234	Xcfb309	Bansal U, Forrest K, Hayden M, Miah H, Singh D, Bariana H (2011) Characterisation of a new stripe rust resistance gene Yr47 and its genetic association with the leaf rust resistance gene Lr52. Theor Appl Genet 122 (8):1461-1466
5B	QYr.uga-5B_AGS2000	XwPt-665267	Xgdm152	Hao Y, Chen Z, Wang Y, Bland D, Buck J, Brown-Guedira G, Johnson J (2011) Characterization of a major QTL for adult plant resistance to stripe rust in US soft red winter wheat. Theor Appl Genet 123 (8):1401-1411
5B	QYrPI192252.wgp-5BS	XIWA6910	Xgwm335	Lu Y, Wang M, Chen X, See D, Chao S, Jing J (2014) Mapping of Yr62 and a small-effect QTL for high-temperature adult-plant resistance to stripe rust in spring wheat PI 192252. Theor Appl Genet 127 (6):1449-1459
7A	QYr.inra-7A_Recital	Xfba127c	Xbarc70	Dedryver F, Paillard S, Mallard S, Robert O, Trottet M, Negre S, Verplancke G, Jahier J (2009) Characterization of genetic components involved in durable resistance to stripe rust in the bread wheat ‘Renan’. Phytopathology 99 (8):968-973
7A	QYr.cim-7AS_Avocet	IWA4528	wPt-4172	Rosewarne G, Singh R, Huerta-Espino J, Herrera-Foessel S, Forrest K, Hayden M, Rebetzke G (2012) Analysis of leaf and stripe rust severities reveals pathotype changes and multiple minor QTLs associated with resistance in an Avocet× Pastor wheat population. Theor Appl Genet 124 (7):1283-1294
7A	Yr61	wmc405	Xwp5467	McIntosh R, Yamazaki Y, Dubcovsky J, Rogers J, Morris C, Appels R, Xia X (2013) Catalogue of gene symbols for wheat in 12th international wheat genetics symposium.
7A	QYr.sun-7A	wPt-7214	wPt-4345	Zwart R, Thompson J, Milgate A, Bansal U, Williamson P, Raman H, Bariana H (2010) QTL mapping of multiple foliar disease and root-lesion nematode resistances in wheat. Mol Breed 26 (1):107-124
7A	QYr.caas-7A_Jingshuan 16	Xbarc127	Xbarc174	Ren, Y., Z. Li, Z. He, L. Wu, B. Bai et al., (2012) QTL mapping of adult‐plant resistances to stripe rust and leaf rust in Chinese wheat cultivar Bainong 64. Theor. Appl. Genet. 125: 1253–1262.
N: information could not be found.

## Sheet: Supplementary Table S5
Supplementary Table S5. Accession number, synonyms, origen, pedigrees and subpopulation for the 245 bread wheat accessions included in the GWAS
No.	ID	ID in T3	Synonym	Program Originala	Program combined	Pedigree	Subpopulation	Comment
1	BERKUT	BERKUT		CMT	CMT	IRENA/BAVIACORA M 92//PASTOR	1
2	CWAM2_9001	CM1_1		CMT	CMT	COOK/VEE//DOVE/SERI/3/BJY/COC	1
3	CWAM2_9009	CM1_9		CMT	CMT	MYNA/VUL//PRL	1
4	CWAM2_9011	CM1_11	TIA.3, TIA 3	CMT	CMT		1
5	CWAM2_9015	CM1_15		CMT	CMT	PAT10/ALD//PAT72300/3/PVN/4/URES/5/PFAU	1
6	CWAM2_9019	CM1_19		CMT	CMT	HD2206/HORK//BUC/BUL	1
7	CWAM2_9020	CM1_20		CMT	CMT	PAT10/ALD//PAT72300/3/PVN/4/BOW	1
8	CWAM2_9023	CM1_23	BACANORA T 88, Bacanora T88, Bacanora T-88	CMT	CMT	JUPATECO-73/(SIB)BLUEJAY//URES-81	1
9	CWAM2_9024	CM1_24		CMT	CMT	FCT/3/GOV/AZ//MUS/4/DOVE/BUC	1
10	CWAM2_9032	CM1_32		CMT	CMT	TRAP#1/BOW	1
11	CWAM2_9038	CM1_38	UP 2338	CMT	CMT		1
12	CWAM2_9040	CM1_40	FANG60/7C	CMT	CMT		1
13	CWAM2_9053	CM1_53		CMT	CMT	PICUS/4/CS5A/5RL-1//BUC/BJY/3/ALD/PVN/5/LAJ3302	1
14	CWAM2_9062	CM1_62		CMT	CMT	BOW/PRL*3/6/WRM/4/FN/3*TH//K58/2*N/3/AUS-6869/5/PELOTAS-ARTHUR/7/HE1/3*CNO79//2*SERI	1
15	CWAM2_9068	CM1_68	PUNJAB 96	CMT	CMT		1
16	CWAM2_9071	CM1_71		CMT	CMT	TIA.4/WL6572//RL6043/3*GEN/3/LUAN	1
17	CWAM2_9073	CM1_73		CMT	CMT	CHIR1//SHA5/WEAVER	1
18	CWAM2_9082	CM1_82		CMT	CMT	GUAM92/KAUZ	1
19	CWAM2_9089	CM1_89		CMT	CMT	SITE/MO/4/NAC/TH.AC//3*PVN/3/MIRLO/BUC	1
20	CWAM2_9092	CM1_92	TAURUM	CMT	CMT		1
21	CWAM2_9110	CM2_16		CMT	CMT	MILAN/S87230//BAV92	1
22	CWAM2_9115	CM2_21		CMT	CMT	TUKURU//BAV92/RAYON	1
23	CWAM2_9118	CM2_24		CMT	CMT	WBLL1*2/VIVITSI	1
24	CWAM2_9124	CM2_30	IRENA	CMT	CMT		1
25	CWAM2_9172	CM2_78		CMT	CMT	MON/IMU//ALD/PVN	1
26	CWAM2_9178	CM2_84		CMT	CMT	TUI/3/TMP64/TWN//SDY/4/RAYON	1
27	CWAM2_9191	CM3_3		CMT	CMT	JUP/BJY//URES/3/HD2206/HORK//BUC/BUL	1
28	CWAM2_9195	CM3_7		CMT	CMT	CROC_1/AE.SQUARROSA (205)//KAUZ/3/ENEIDA	1
29	CWAM2_9198	CM3_10	BARBET1	CMT	CMT		1
30	CWAM2_9214	CM3_26	SOROCA	CMT	CMT		1
31	CWAM2_9217	CM3_29		CMT	CMT	NAI60/HEINE VII//BUC/3/PSN/BOW//TUI	1
32	CWAM2_9223	9223	3868699	CMT	CMT	SERI*3//RL6010/4*YR/3/PASTOR/4/BAV92	1
33	CWAM2_9225	9225	3888537, SOKOLL, CM3_37	CMT	CMT	PASTOR/3/ALTAR 84/AEGILOPS SQUARROSA (TAUS)//OPATA M 85	1
34	CWAM2_9226	CM3_38		CMT	CMT	CROC_1/AE.SQUARROSA (213)//PGO/3/BAV92	1
35	CWAM2_9228	9228	4315350	CMT	CMT	ALTAR 84/AE.SQUARROSA (221)//PASTOR/3/PASTOR	1
36	CWAM2_9229	9229	4563437	CMT	CMT	MILAN/KAUZ//PASTOR	1
37	CWAM2_9232	9232	4563461	CMT	CMT	VEBOW/IRENA	1
38	CWAM2_9233	9233	4563470	CMT	CMT	PASTOR/DHARWAR DRY	1
39	CWAM2_9240	9240	4753157	CMT	CMT	KABY/BAV92/3/CROC 1/AE.SQUARROSA (224)//OPATA	1
40	CWAM2_9241	9241	4753188	CMT	CMT	BOW//BUC/BUL/3/KAUZ/4/BAV92/5/MILAN/KAUZ	1
41	CWAM2_9242	9242	4578411	CMT	CMT	PASTOR//MILAN/KAUZ/3/VEE/PJN//2*TUI	1
42	CWAM2_9245	9245	4564440	CMT	CMT	FRAME/BUCHIN	1
43	CWAM2_9246	9246	4799210	CMT	CMT	TEMPORALERA M 87*2/KONK	1
44	CWAM2_9247	9247	4883041	CMT	CMT	FRAME*2/3/URES/JUN//KAUZ	1
45	CWAM2_9248	9248	4882998	CMT	CMT	CROC 1/AE.SQUARROSA (224)//OPATA/3/PASTOR/4/PASTOR*2/OPATA	1
46	CWAM2_9249	9249	4885594	CMT	CMT	RL6043/4*NAC//2*PASTOR	1
47	CWAM2_9253	9253	4963944	CMT	CMT	KRICHAUFF/2*PASTOR	1
48	CWAM2_9254	9254	4878600	CMT	CMT	KABY//2*ALUBUC/BAYA	1
49	CWAM2_9256	9256	4878677	CMT	CMT	BUC/MN72253//PASTOR/3/BAV92	1
50	CWAM2_9258	9258	4961206	CMT	CMT	CROC 1/AE.SQUARROSA (224)//OPATA/3/BJY/COC//PRL/BOW/4/BJY/COC//PRL/BOW	1
51	CWAM2_9261	9261	4934637	CMT	CMT	ALTAR 84/AEGILOPS SQUARROSA (TAUS)//OPATA/3/ATTILA	1
52	CWAM2_9269	CM3_81		CMT	CMT	SAAR/WBLL1	1
53	CWAM2_9284	CM4_284		CMT	CMT	PRL/SARA//TSI/VEE#5/3/TILHI/4/ATTILA/2*PASTOR	1
54	CWAM2_9288	CM4_288	QUAIU #1	CMT	CMT		1
55	CWAM2_9291	CM4_291	BECARD	CMT	CMT		1
56	HAHN_1RS	HAHN-1RS		CMT	CMT	CEBECO-148/(SIB)KATHADIN/7/HEINES-KOLBEN/38-MA/4/4777/3/REI//YAQUI/KENTANA/5/YECORA-70/6/TUCAN	1
57	PSB14097	OPATA	Opata 85	CMT	CMT	Bluejay/Jupateco 73	1	Mexico
58	PSB14200	14200	Grackle	CMT	CMT	Waxwing*2/Kukuna	1	Mexico
59	PI520108	PI520108	PI520108	CMT	CMT		1	Breeding line from Federal District Mexico
60	PI610755	PI610755	PI610755	CMT	CMT		1	Breeding line from Federal District Mexico
61	PI614012	PI614012	PI614012	CMT	CMT		1	Breeding line from Federal District Mexico
62	PSB14057	14057	Pato	CMT	CMT	Tezanos Pintos Precoz/Sonora 64A//Narino 59	1	Mexico
63	PSB14071	SERI82	Seri 82	CMT	CMT	Kavkaz/(SIB)Buho//Kalyansona/Bluebird	1	Mexico
64	PSB14094	14094	Tonichi 81	CMT	CMT	Cargill 422/Anahuac F75	1	Mexico
65	PSB14098	14098	Esmeralda M86	CMT	CMT	Buckbuck sib/Bluejay sib	1	Mexico
66	PSB14105	14105	CIGM91.153	CMT	CMT	Yaco *2//Crocl/Ae. tauschii ( 205 )/3/Yaco	1	Mexico
67	PSB14126	Pastor	Pastor	CMT	CMT	PFAU/Seri-M-82//Bobwhite	1	Mexico
68	PSB14252	14252	CIGM90.250.2	CMT	CMT	Croc1/Ae. tauschii ( 205 )// Borlaug M95	1	Mexico
69	PSB14143	14143	Super X	CMT	CMT	Penjamo 62 sib/Gabo 55	1	Mexico
70	BRICK	SD3851	Brick, PI657697, SPL313	SDK	SDK	ND 2897/SD3219//SD3414	2
71	BRIGGS	BRIGGS	PI632970, SPL106	SDK	SDK	BW114/BERGEN//SD3097	2
72	OXEN	OXEN	PI596770, SPL110	SDK	SDK	YW352/SBZ004A	2
73	SD4076	SD4076		SDK	SDK	SD3546/SD3722	2
74	SD4178	SD4178		SDK	SDK	SD3720/MN98389-A	2
75	SD4199	SD4199		SDK	SDK	PI67392/SD3618//ND750	2
76	SD4214	SD4214		SDK	SDK	DAPPS/SD3868	2
77	SD4218	SD4218		SDK	SDK	SD3687/FN1704-315	2
78	SD4243	SD4243		SDK	SDK	FN1504-19/GRANGER	2
79	SD4264	SD4264		SDK	SDK	ATILLA COMPLEX/FORGE//ND747	2
80	SD4279	SD4279		SDK	SDK	NDSW0601/00S0219-10W	2
81	SD4280	SD4280		SDK	SDK	SD3746/SD3776//SD4032	2
82	10010_20	10010-20	10010/20	UCD	UCD	UC1360/BLANCA GRANDE	1
83	10014_7	10014/7		UCD	UCD	F7-3-5-2/3*UC1041 2NS	1
84	12010_10	12010_10		UCD	UCD	INIAP-ALTAR 82/UC1107	1	UCD
85	12010_12	12010_12		UCD	UCD	MADSEN/ANZA/2/3*UC1041/3/SUMMIT	1	UCD
86	12010_16	12010_16		UCD	UCD	STANDER//MADSEN/2*EXPESS	1	UCD
87	12010_18	12010_18		UCD	UCD	PLATTE/UC896 (low PPO)//PLATA	1	UCD
88	12010_21	12010_21		UCD	UCD	UC1041 Yr5 Yr15 Lr37 Lr47 Gpc (tall plant)	1	UCD
89	12010_27	12010_27		UCD	UCD	UC1041-Yr15-Lr37-Stb4/UC1107-Lr37	1	UCD
90	12010_29	12010_29		UCD	UCD	UC1107 5+10 2NS Yr15/Milan	1	UCD
91	ATTILA_1RS	ATTILA-1RS		UCD	UCD	Attila-1RS	1
92	ATTILA_1RSMA	ATTILA-1RSMA		UCD	UCD	Attila-1RSMA	1
93	BLANCA_FUERTE	BLANCA_FUERTE	BlancaFuerte	UCD	UCD		1
94	BLANCA_GRANDE_515	BLANCA_GRANDE_515	BlancaGrande515	UCD	UCD		1
95	EXPRESSO	EXPRESSO	PI615616	UCD	UCD	Express 6*/Yr15 Avocet//Express 6*/Madsen	1
96	HAHN_1RSMA	HAHN-1RSMA		UCD	UCD		1
97	LASSIK	LASSIK	UC1495	UCD	UCD		1
98	PATWIN_515	PATWIN-515	PI666962	UCD	UCD	PATWIN/5*Yr5_and_Yr15	1	UCD
99	PAVON	PAVON	Pavon F76, PI519847, CM2_28	UCD	UCD	Vicam // Ciano sib / Siete Cerros 66 /3/ Kalyansona / Bluebird	1
100	PAVON_1RS	PAVON-1RS		UCD	UCD		1	UCD
101	RIL203_UC1110XCIMMYT2	RIL203		UCD	UCD	UC1110/CYMMIT2	1
102	RIL29_UC1110XCIMMYT2	RIL29		UCD	UCD	UC1110/CYMMIT2	1
103	RSI5(YR5+YR15+GPC-B1+GluA1a)	RSI5_YR5_YR15_GPC_HMW1	RSI5(YR5+YR15+GPC-B1+GluA1a)	UCD	UCD		1
104	SUMMIT_515	SUMMIT_515	Summit515, Summit 515	UCD	UCD		1
105	UC1110	UC1110	GSTR13501	UCD	UCD	CKR'S'/3/YD'S'/2/BB/CHA	1	mapping parent
106	UC1395_LR34_YR18	UC1395_LR34_YR18	UC1395Lr34/Yr18	UCD	UCD	UC1395 Lr34 Yr18	1	UC1395 introgressed with the Lr34/Yr18 allele by 4 backcrosses and selection of homozygous Lr34/Yr18 BC4F2 plants. One of a near isogenic pair with UC1395.
107	UC1396	UC1396		UCD	UCD		1	one of the near isogenic pair with UC1396_LR34_YR18
108	UC1551	UC1551		UCD	UCD	MILAN/MUNIA (selection)	1
109	UC1552	UC1552		UCD	UCD	OR791432/VEE#33.2//MILAN (selection)	1
110	UC1599	UC1599		UCD	UCD	Summit/3/HAHN/TURACO/2/TURACO	1
111	UC1601	UC1601		UCD	UCD	UC1361/UC1296	1
112	UC1602	UC1602		UCD	UCD	IDO377S/UC1361	1
113	UC1603	UC1603		UCD	UCD	UC1107 5+10 Yr5 Yr15 2NS	1
114	UC1616	UC1616		UCD	UCD	UC1357/KERN Lr37	1
115	UC1618	UC1618		UCD	UCD	MADSEN/2*EXPRESS	1
116	UC1642	UC1642		UCD	UCD	UC1357/EXPRESS LR37	1
117	UC1643	UC1643		UCD	UCD	UC896*4/IDO377S//KLASIC*2/IDO377S/3/UC896 5+10	1
118	UC1679	CLEAR_WHITE_515	UC1679, ClearWhite515	UCD	UCD	Clear White Yr5 Yr15 Gpc 2NS	1
119	UC1682	UC1682		UCD	UCD	UC1036 Yr5 Yr15 Gpc 2NS	1
120	UC1683	UC1683		UCD	UCD	UC1110 5+10 Yr5 Yr15 2NS Gpc	1
121	UC1710	UC1710		UCD	UCD	WEAVER//VEE/PJN/3/MILAN	1	UCD
122	UC1713	UC1713		UCD	UCD	RED RIVER 68//SERRA/UC1161	1	UCD
123	UC896(5+10,LR34,YR18,YR5,GPC-B1)	UC896_5+10_LR34_YR18_YR5_GPC	UC896(5+10,LR34,YR18,YR5,GPC-B1)	UCD	UCD	UC896 5+10 Lr34 Yr18 Yr5 Gpc	1
124	ALTURAS	ALTURAS	IDO526, PI620631	UIA	UIA	Whitebird/Centennial	3
125	CATALDO	CATALDO	IDO642, UI Cataldo, PI642361, UICATALDO	UIA	UIA	IDO584/4*Alturas	3
126	CENTENNIAL	CENTENNIAL	IDO312, PI537303	UIA	UIA	Cowbird"S"/2*Sterling	3
127	ID0696	ID0696	A03814S-L-1	UIA	UIA	[McNeal/Lolo]F3 seln//2*Lolo	3
128	IDO377S	IDO377S	IDO377, PI591045	UIA	UIA	Chova/59AB10293-5	3
129	IDO440	IDO440	A8235S	UIA	UIA	IDO130*2//Maya74/Pavon/3/Slg	3
130	IDO488	IDO488	IDO471 RESEL	UIA	UIA	PI294994/4*Centennial	3
131	IDO560	IDO560	A91229S-4	UIA	UIA	Winsome/Bronze Chief	3
132	IDO582	IDO582	A94348S-E-2	UIA	UIA	Pomerelle*2/Pavon76	3
133	IDO599	IDO599	A94368S-B-7, PI660550	UIA	UIA	Pomerelle*2/Tui	3
134	IDO629	IDO629	A00149S-4, PI642365	UIA	UIA	IDO505*2/3/Kanto79/2*IDO488//Bai Huo, wxy	3	Waxy
135	IDO644	IDO644	A97067S-C-3, PI660549	UIA	UIA	M6/Opata#9//2*Treasure	3
136	IDO671	IDO671	A99341S-L-9, PI660548	UIA	UIA	Alturas*2/WPB936	3
137	IDO687	IDO687	A99038S-H-1, PI660552	UIA	UIA	Alturas//IDO541/Vanna	3
138	IDO694	IDO694	A01178S-1	UIA	UIA	Blanca Grande/Jerome	3
139	IDO702	IDO702	A99372S-F-10	UIA	UIA	Hank/JFSN//IDO558	3
140	IDO851	IDO851	A00007S-H-4	UIA	UIA	Alturas*2/Cadoux	3
141	IDO852	IDO852	A01910S-2	UIA	UIA	IDO599/IDO569	3
142	IDO854	IDO854	A01022S-6	UIA	UIA	Alturas/IDO582	3
143	JEROME	JEROME	IDO566, PI632712	UIA	UIA	Sunstar 2/WPB926	3
144	JUBILEE	JUBILEE	IDO525, PI614839	UIA	UIA	IDO184/IDO159//Tonichi.sib/2*Sterling	3
145	LOLO	LOLO	IDO533, PI614840	UIA	UIA	Oasis/IDO377	3
146	UI_LOCHSA	UI_LOCHSA	IDO597, PI639952, UILOCHSA	UIA	UIA	WPB936/Wilgoyne//Sunstar I	3
147	UI_PETTIT	UI_PETTIT	IDO632, PI642363, UIPettit	UIA	UIA	Pomerelle*2/Fujimi Komugi	3
148	UI_WINCHESTER	WINCHESTER	IDO578, UI_WINCHESTER, PI642362, UIWINCHESTER	UIA	UIA	WPB926/WA7702	3	Cultivar from Idaho United States
149	WHITEBIRD	WHITEBIRD	IDO392	UIA	UIA	Owens/IDO159	3
150	ADA	ADA	PI642856, SPL107	UMN	UMN	SBY189H/2375	2
151	MN01333_A	MN01333-A	SPL262	UMN	UMN	MN97008/MN97695	2
152	MN02072_7	MN02072-7	SPL263	UMN	UMN	MN97695/MN97518	2
153	MN03119_4	MN03119-4		UMN	UMN	ALSEN-1/MN97803-10	2
154	MN03148	MN03148	SPL264	UMN	UMN	MN99390-1/MN97803-10	2
155	MN03306_1	MN03306-1		UMN	UMN	OKLEE//PARSHALL/MN97518	2
156	MN03308_4	MN03308-4		UMN	UMN	Oklee//Parshall/MN97518	2
157	MN05141_2	MN05141-2		UMN	UMN	MN99017-6/Ulen	2
158	MN06018	MN06018		UMN	UMN	MN97695-4/ALSEN-1	2
159	MN06028	MN06028	SPL266	UMN	UMN	MN97695-4/Ada sel	2
160	MN07098_6	MN07098-6	SPL269	UMN	UMN	SD3696/MN97803-3BS	2
161	MN07199_6	MN07199-6		UMN	UMN	MN97803-3BS/MN01333-A-1	2
162	MN07338	MN07338		UMN	UMN	MN99021-1/MN97695	2
163	MN08013_2	MN08013-2		UMN	UMN	MN02149/MN02252-1	2
164	MN08106_6	MN08106-6		UMN	UMN	ORL-94346-1/MN97803-3BS//MN99436-6	2
165	OKLEE	OKLEE	PI634553, SPL102	UMN	UMN	2375/sbf0670	2
166	ROLLAG	ROLLAG	SPL281	UMN	UMN	Ada sel 2*//RL4970-4	2
167	TOM	TOM	SPL283	UMN	UMN	97T-1003/Verde	2
168	VERDE	VERDE	PI592561, SPL284	UMN	UMN	SBE0437	2
169	H0800103L	H0800103L		WAS	WAS	WA7953 (H0100073)/EST02008	3
170	H0800310	H0800310		WAS	WAS	H0300066L/Hank	3
171	H0800314	WA8148	H0800314	WAS	WAS	H0300066L/Hank	3
172	H0900081	H0900081		WAS	WAS	SRS05189//Scarlet Rhizoc S-015 BC2/Scarlet Yr 5 + Yr 15 #1	3
173	HR07024_5	HR07024-5		WAS	WAS	H0400072L/Jerome	3
174	HW080169	HW080169		WAS	WAS	Macon*6/EltanBC5F1//Eltan*2/Macon(BC1F5 7-17)	3
175	KELSE	KELSE	WA007954	WAS	WAS	Westbred 906R / PI520542 // Scholar	3
176	MACON	MACON	WA007899	WAS	WAS	Serra / Westbred926 // Tanager 'S' ( PI 519878 )/ Pewee 'S' ( PI 519819 )	3
177	PSB14127	PENAWAWA	Penawawa	WAS	WAS	Potam 70 / Fielder	3	USA, Washington
178	TARA2002	TARA2002	WA007998	WAS	WAS	Tara 2002 *6/ Glupro	3
179	WA8016	WA8016		WAS	WAS	Scarlet*6/Glupro (2003 BC5 F5)	3
180	WA8074	WA8074		WAS	WAS	WA7839/ID529	3
181	WA8099	WA8099		WAS	WAS	Tara*6/ND683	3
182	WA8123	WA8123		WAS	WAS	ID597//WA7931*2/P9347A1-2	3
183	WA8133	WA8133		WAS	WAS	Blanca Grande//WA7931*2/P985RE1-16	3
184	CWAM2_9201	CM3_13	SPL188, Weebill 1, CM3_13, Weebill_1	NSG	Other		4
185	PI371967	PI371967	PI371967	NSG	Other		4	Cultivar from Fukuoka Japan
186	PI384033	PI384033	PI384033	NSG	Other		4	Cultivar from Israel
187	PI384036	PI384036	PI384036	NSG	Other		4	Cultivar from Israel
188	PI410650	PI410650	PI410650	NSG	Other		4	Landrace line from Azad Kashmir Pakistan
189	PI428528	PI428528	PI428528	NSG	Other		4	Cultivar from Ville-de-Paris France
190	PI429323	PI429323	PI429323	NSG	Other		4	Breeding line from Yemen
191	PI430750	PI430750		NSG	Other		4	Breeding line from Yemen
192	PI449298	PI449298	PI449298	NSG	Other		4	Breeding line from Zaragoza Spain
193	PI462106	PI462106	PI462106	NSG	Other		4	Cultivated line from Yemen
194	PI519908	PI519908	PI519908	NSG	Other		4	Breeding line from South Africa
195	PI525284	PI525284	PI525284	NSG	Other		4	Cultivated line from Marrakech Morocco
196	PI532082	PI532082	PI532082	NSG	Other		4	Cultivated line from Daqahliya Egypt
197	PI532278	PI532278	PI532278	NSG	Other		4	Cultivated line from Oman
198	PI565211	PI565211	PI565211	NSG	Other		4	Landrace line from Tarija Bolivia
199	PI574250	PI574250	PI574250	NSG	Other		4	Breeding line from Syria
200	PI584920	PI584920	PI584920	NSG	Other		4	Cultivar from Mato Grosso do Sul Brazil
201	PI596367	PI596367	PI596367	NSG	Other		4	Breeding line from Saskatchewan Canada
202	PI623296	PI623296	PI623296	NSG	Other		4	Landrace line from Khorasan Iran
203	PI623302	PI623302	PI623302	NSG	Other		4	Landrace line from Khorasan Iran
204	PI623335	PI623335	PI623335	NSG	Other		4	Landrace line from Khorasan Iran
205	PSB14030	14030	Bass	NSG	Other	Flinders/2* Cook	4	Australia
206	PSB14092	14092	Timgalen	NSG	Other	Aguilera/Kenya/Marroqui/Supremo//Gabo//Winglen	4	Australia
207	PSB14195	GLENN	Glenn	NSG	Other	'Sumai 3'(PI 481542)/'Wheaton'(PI 469271)//'Grandin'(PI 531005)/3/ ND 688	4	North Dakota
208	PSB14209	14209	AC Phil	NSG	Other	PT303/Dirkwin//Kenya 321/Fieldwin ; sister selection to AC Reed	4	Canada, Alberta
209	PSB14220	ARRINO	Arrino	NSG	Other	77-W-660/Eradu	4	Australia
210	PSB14316	KRICHAUFF	Krichauff	NSG	Other	Wariquam//Kloka/Pitic-62/3/Warimek/Halberd/4/3-AG-3/Aroona	4	Australia
211	PSB14324	14324	Lark	NSG	Other	Pitic 62/4/Kenya 58/Newthatch//Thatcher/3/Frontana/Thatcher /5/Sonora 64	4	USA, California
212	5702PR	5702PR		ALB	Other		4
213	LASER	LASER		ALB	Other		4
214	PT765	PT765		ALB	Other		4
215	PSB14286	GLADIUS	Gladius	CNL	Other	RAC-875/KRICHAUFF//EXCALIBUR/KUKRI/3/RAC-875/KRICHAUFF/4/RAC-875//EXCALIBUR/KUKRI	4	Australia
216	PSB14341	MOLINEUX	Molineux	CNL	Other	PITIC-62/FESTIGUAY//2*WARIGAL	4	Australia
217	PSB14366	PUGSLEY	Pugsley	CNL	Other	Frame/Trident	4	Australia
218	PSB14310	14310	Kanchan	EVI	Other	C-306/OP-301	4	Bangladesh
219	PSB14408	14408	Vaishali	EVI	Other	Kallyansona/HD-2281	4	India
220	CAP151_3	CAP151-3		MSU	Other	Vida*3/CAP19	4
221	MT0802	MT0802		MSU	Other	McNeal/MT0266	4
222	MT0813	MT0813		MSU	Other	Hank/MT0249	4
223	MT0945	MT0945		MSU	Other	Hank//McNeal/Reeder	4
224	MTHW0771	MTHW0771		MSU	Other	MTHW0202/Choteau	4
225	MTHW1060	MTHW1060		MSU	Other	MTHW0202/BW315A	4
226	AC_ANDREW	AC_ANDREW	ACAndrew	SSK	Other		4	From the AAFC LRC
227	AC_CRYSTAL	AC_CRYSTAL	ACCrystal, SPL83	SSK	Other		4	from AAFC SPARC
228	AC_KARMA	AC_KARMA	ACKarma, SPL85	SSK	Other		4	from AAFC SPARC
229	AC_VISTA	AC_VISTA	ACVista	SSK	Other		4	from AAFC SPARC
230	CDC_ALSASK	CDC_ALSASK	BW301, CDCAlsask, CDCGo	SSK	Other	AC_Elsa/AC_Cora	4	from U OF S. CDC
231	SC80221V2	SC80221V2		SSK	Other		4	from AAFC SPARC
232	HWO90071M	HWO90071M		UNK	Other		4
233	PSB14002	14002	Dariel	UNK	Other	Hork/Yamhill//Kalyansona/Bluebird	4	Israel
234	PSB14215	14215	Anlace	UNK	Other	Amigo/4*Tatiara	4	Australia
235	PSB14270	14270	Elissavet	UNK	Other	Joss Cambier /\222Emu//Chiroca/4/Ias 20//Willet Enano*3/Narino 59/3/Kavko	4	Greece
236	PSB14322	14322	Kukri	UNK	Other	Madden/6*Rac-177//Grajo/76-ECN-44	4	Australia
237	PSB14390	14390	Takari	UNK	Other	KITE/3/(TAM-242)FROCOR/KENTANA(IRN-62-101)//2*FESTIGUAY	4	Australia
238	PSB14395	14395	Taylor	UNK	Other	RI 35/Mapucha	4	France
239	PSB14434	14434	Colfiorito	UNK	Other	Irnerio/IS 237//Argelato	4	Italy
240	PSB14447	14447	Guadalupe	UNK	Other	155.13/Recital	4	France
241	PSB14455	14455	Pandas	UNK	Other	Orso//Bezostaja/S1//Generoso 7/C. Marzabotto	4	Italy
242	PSB14463	14463	Sirmione	UNK	Other	(Argelato/((F3))TW1/Lankota))//(((F3) Pusa S-3/F 26 70)//(Kalyansona/Atlas 66))	4	Italy
243	PSB14475	14475	Zena	UNK	Other	Sprint/Concordia	4	Italy
244	PSB14479	14479	Bandera	UNK	Other	Geppetto/Apache//8248	4	France
245	AGAWAM	AGAWAM	PI648027	WES	Other	Fortuna/WestBred 906R/Golden 86	4
a CMT: CIMMYT; NSG: National Small Grains Collection; SDK: South Dakota State University; UCD: University of California; UIA: University of Idaho; UMN: University of Minnesota; WAS: Washington State University; MSU: Montana State University; SSK: Agriculture and Agri-Food Canada, Saskatchewan; ALB: Agriculture and Agri-Foods Canada, Alberta; CNL: Cornell University; EVI: EVIGEZ Czech Republic; WE…
More information could be found on T3 website

## Sheet: Supplementary Table S6
Supplementary Table S6. Wheat differential lines used for race typing of races of Puccinia striiformis f. sp. tritici.
Set	No.	Genotype	Yr gene(s)
Avocet near-isogenic lines	1	Avocet/YRA+	YRA+
	2	Avocet/-YRA	YRA-
	3	YR1/6*/Avocet	YR1
	4	YR5/6*/Avocet	YR5
	5	YR6/6*/Avocet	YR6
	6	YR7/6*/Avocet	YR7
	7	YR8/6*/Avocet	YR8
	8	YR9/6*/Avocet	YR9
	9	YR10/6*/Avocet	YR10
	10	YR12/3*/Avocet	YR12
	11	YR15/6*/Avocet	YR15
	12	YR17/6*/Avocet	YR17
	13	YR24/3*/Avocet	YR24
	14	YR26/3*/Avocet	YR26
	15	YR27/6*/Avocet	YR27
	16	Avocet-YR*31/Pastor	YR31
	17	Yr SP/6*Avocet	YRSP
	18	YrCV/6*Avocet	YRCV
	19	YrSK/6*Avocet	YRSK
CIMMYT cultivars	20	Pavon F 76	YR6/YR7/YR29/YR30
	21	Seri M 82	YR2/ YR7/ YR29/ YR30
	22	Tatara	YR3
European cultivars	23	Warrior	Unknown
	24	Ambition	Amba
Argentinian cultivars (references)	25	Algarrobob	Unknown
	26	Baguette 750c	Unknown
a Resistance specificity of variety Ambition
b Universally susceptible to Pst
c Susceptible to races of Pst with higher virulence spectrum

## Sheet: Supplementary Table S7
Supplementary Table S7. Virulence/avirulence formula of the Puccinia striiformis f. sp. tritici races used for seedling resistance screening.
Race	Virulence /avirulence formula
Yr19-71	Yr1, Yr2, YR3, Yr6, Yr7, Yr9, Yr12, Yr17, Yr29, Yr30, Yr31, YrA-, Yr32, YrA+, Amb / Yr5, Yr8, Yr10, Yr15, Yr24, Yr26, Yr27, YrSK, YrSP
Yr20-161	Yr2, Yr6, Yr7, Yr9, Yr12, Yr17, Yr29, Yr30, Yr31, Yr32, YrA- / Yr1, YR3, Yr5, Yr8, Yr10, Yr15, Yr24, Yr26, Yr27, YrA+, YrSK, YrSP, Amb
